# Supplementary material for: Mutual Solubilities between Ethylene Glycol and Organic Diluents: Gas Chromatography and NMR
Source: Molecules. 2023 Jun 29;28(13):5121. doi: 10.3390/molecules28135121 (PMC10343684; doi:10.3390/molecules28135121)
Supplement: Supplementary file 1 [file molecules-28-05121-s001.zip › molecules-2470912-supplementary.pdf]

## SUPPLEMENTARY MATERIAL

### Mutual solubilities between ethylene glycol and organic diluents: Gas chromatography and NMR

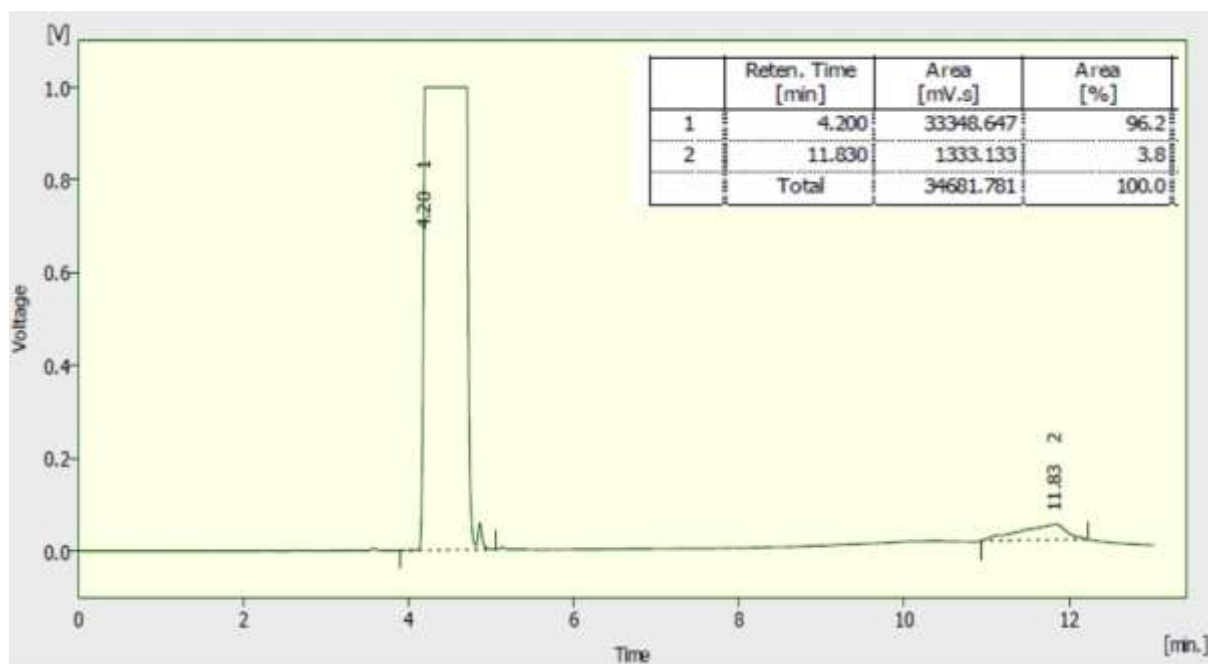

**Figure S1.**  $C_6H_6$  after mixing with EtG (3h).

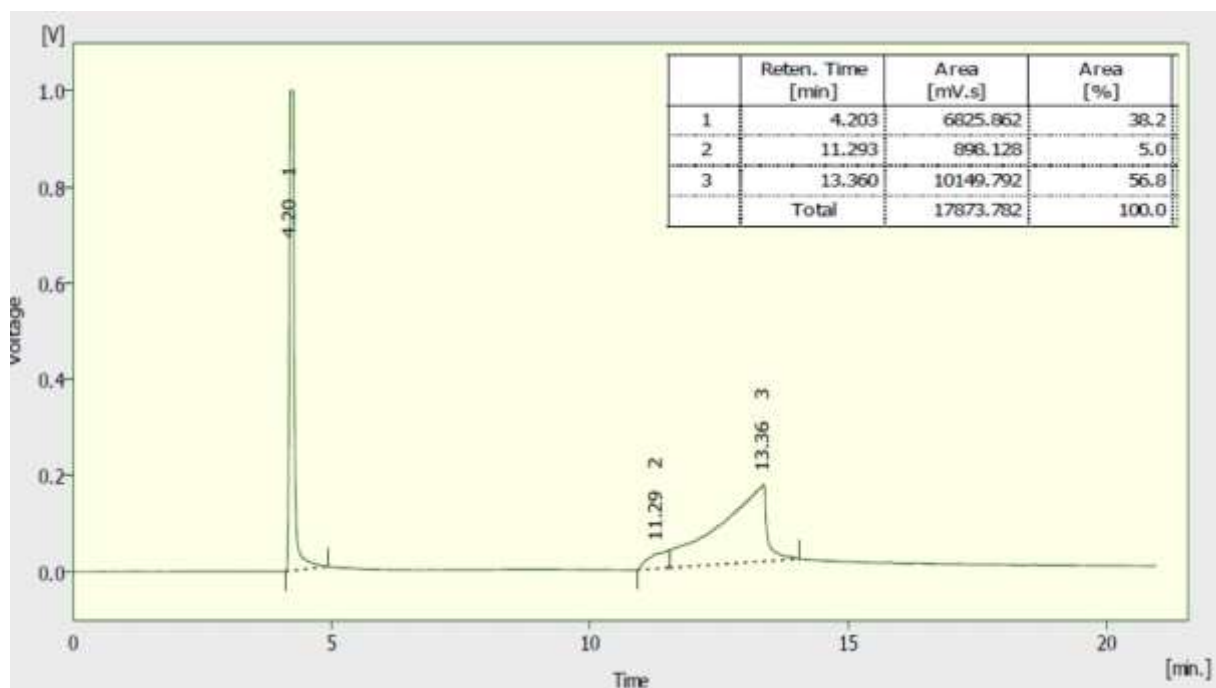

**Figure S2.** EtG after mixing with C<sub>6</sub>H<sub>6</sub> (3h).

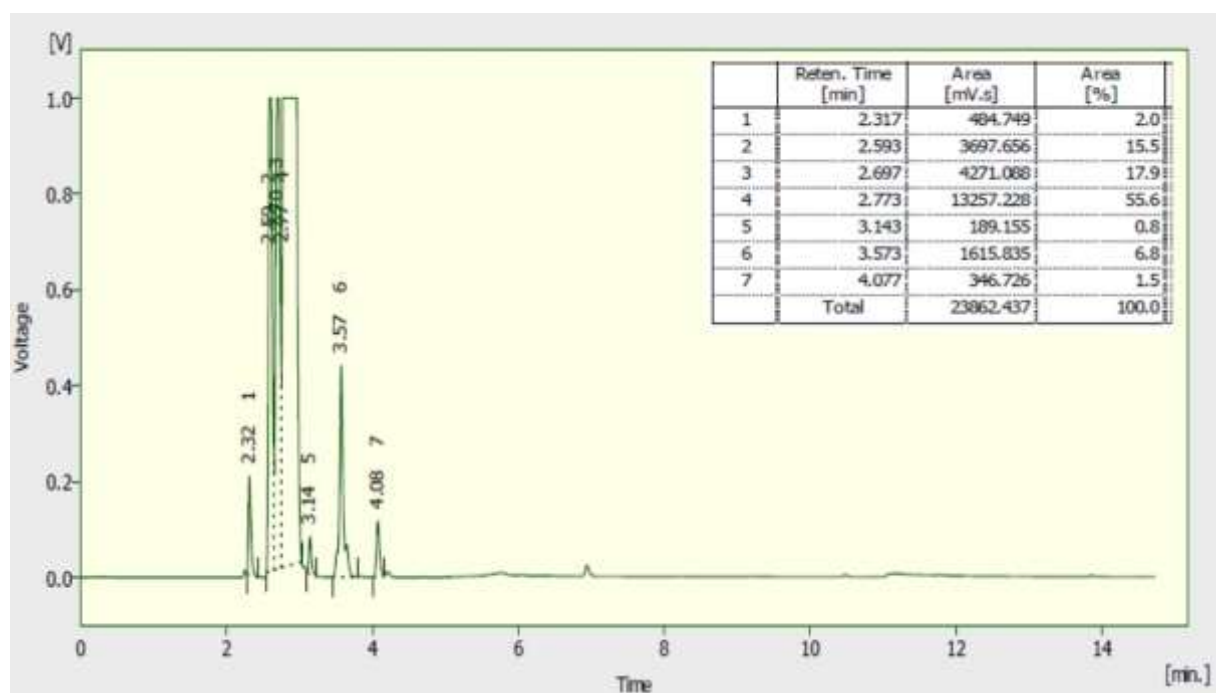

**Figure S3.** Hexane after mixing with EtG (3h).

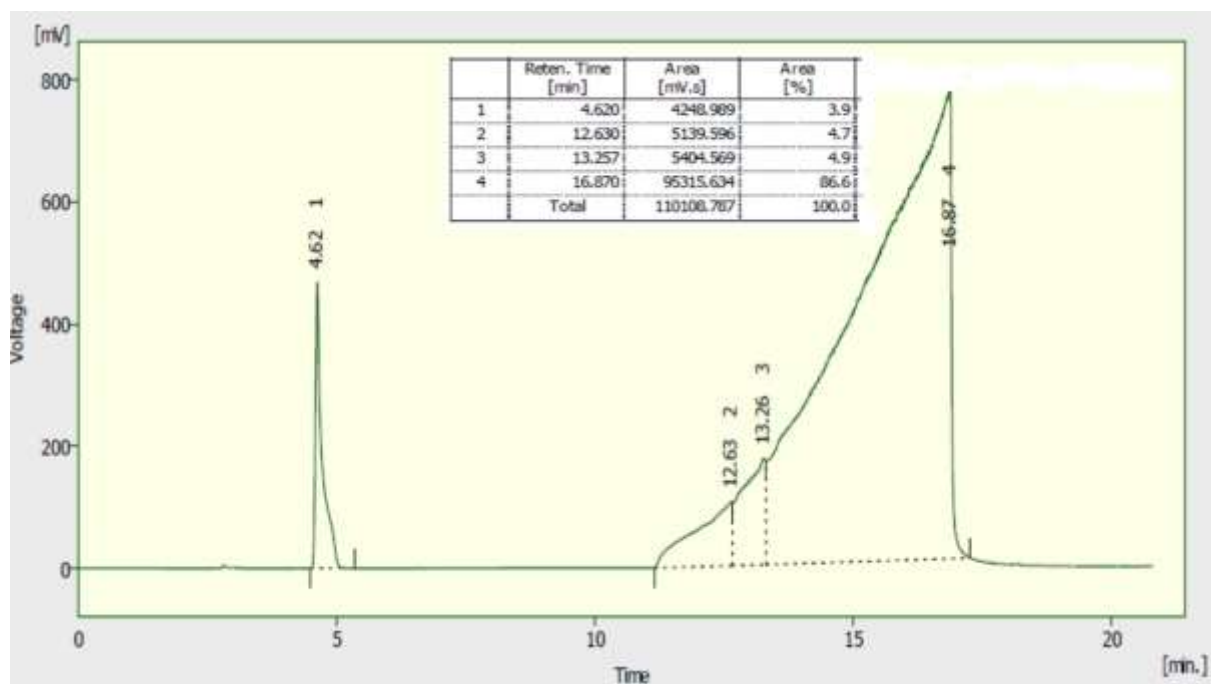

**Figure S4.** EtG after mixing with n-hexane (3h).

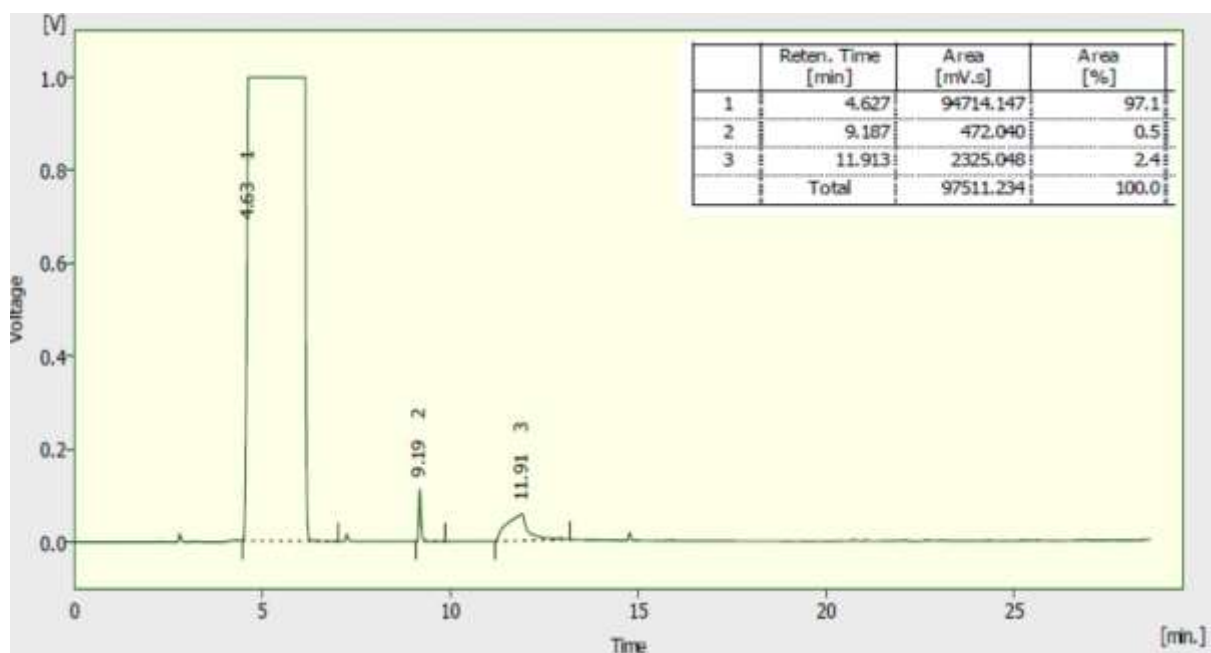

**Figure S5.** C<sub>2</sub>H<sub>4</sub>Cl<sub>2</sub> after mixing with EtG (3h).

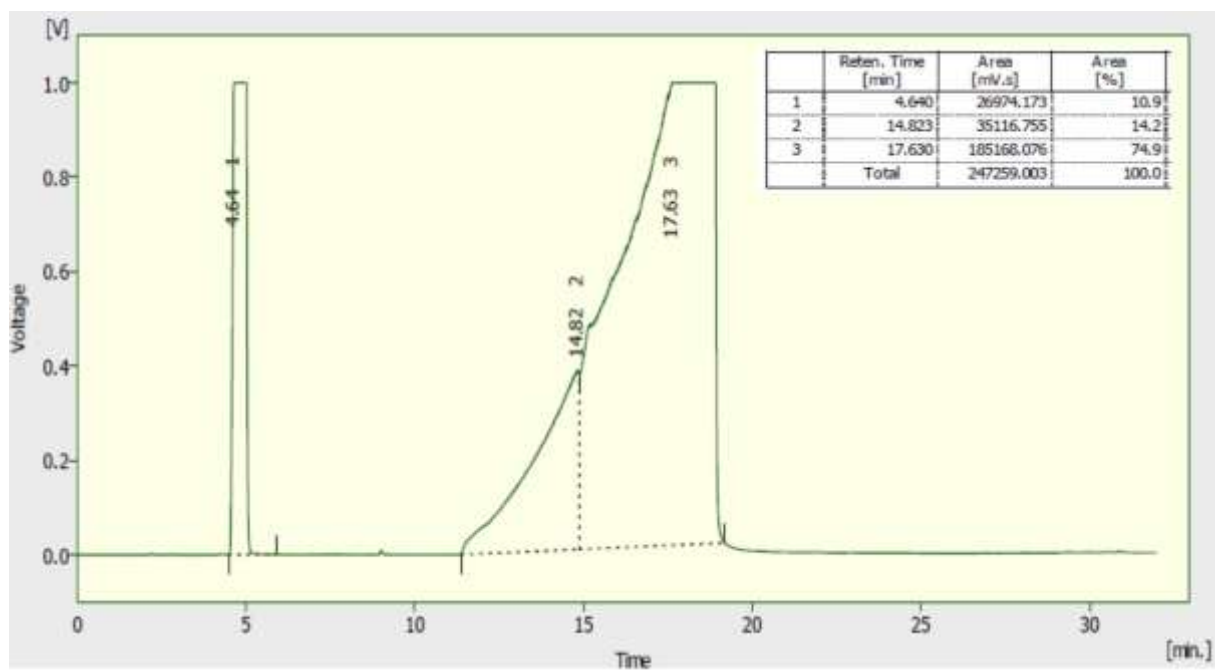

**Figure S6.** EtG after mixing with  $\text{C}_2\text{H}_4\text{Cl}_2$  (3h).

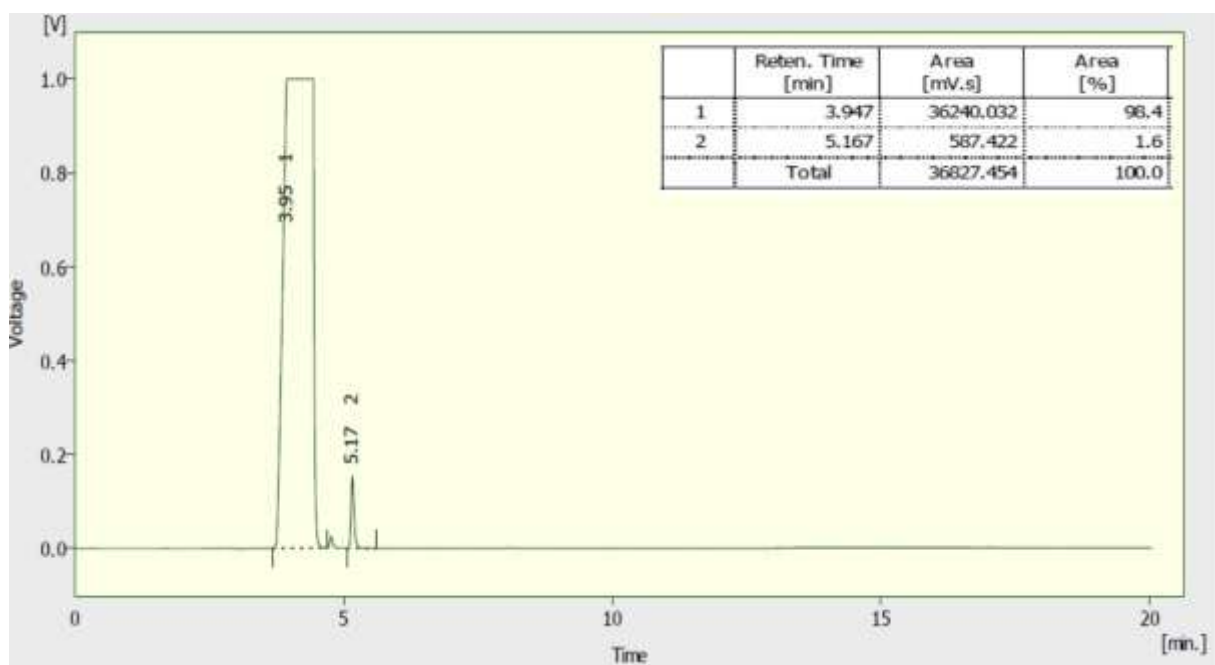

**Figure S7.**  $\text{CCl}_4$  after mixing with EtG (3h).

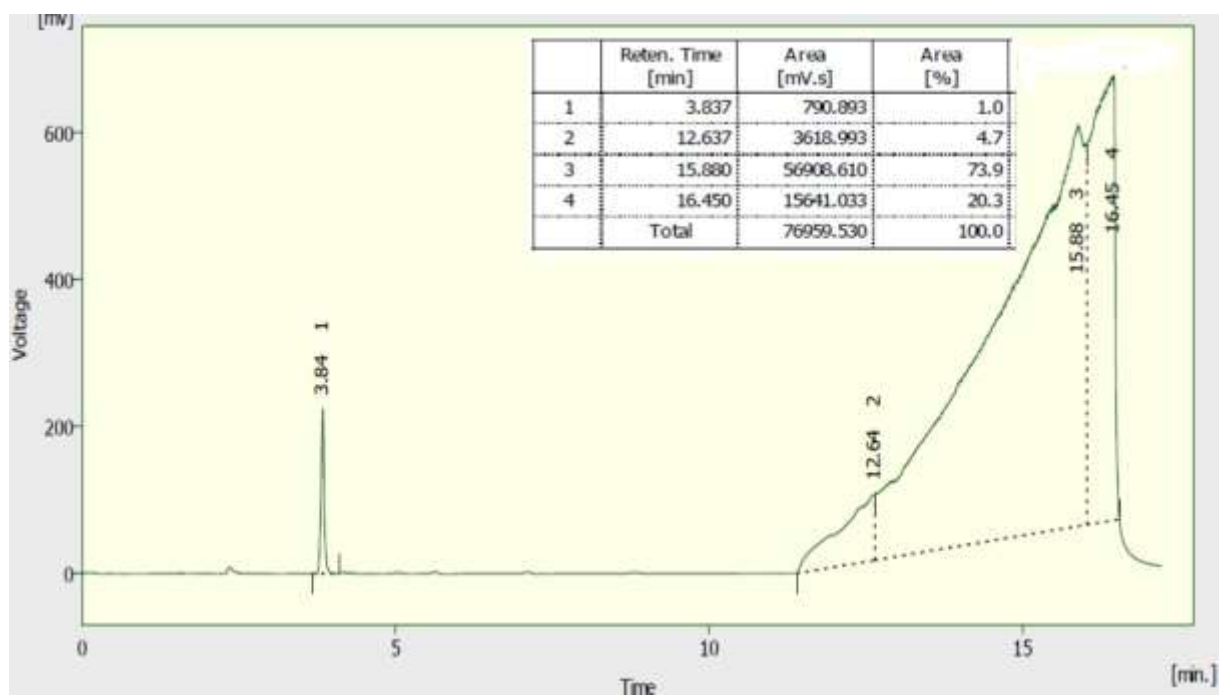

**Figure S8.** EtG after mixing with CCl<sub>4</sub> (3h).

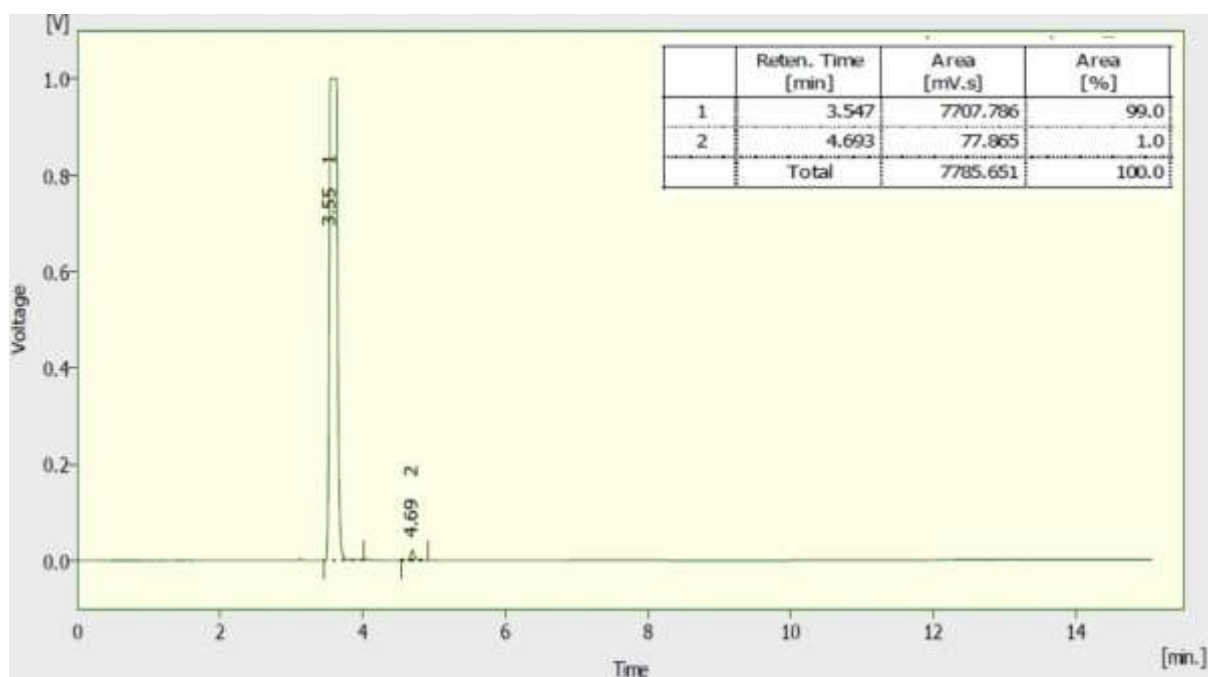

**Figure S9.** C<sub>6</sub>H<sub>12</sub> after mixing with EtG (3h).

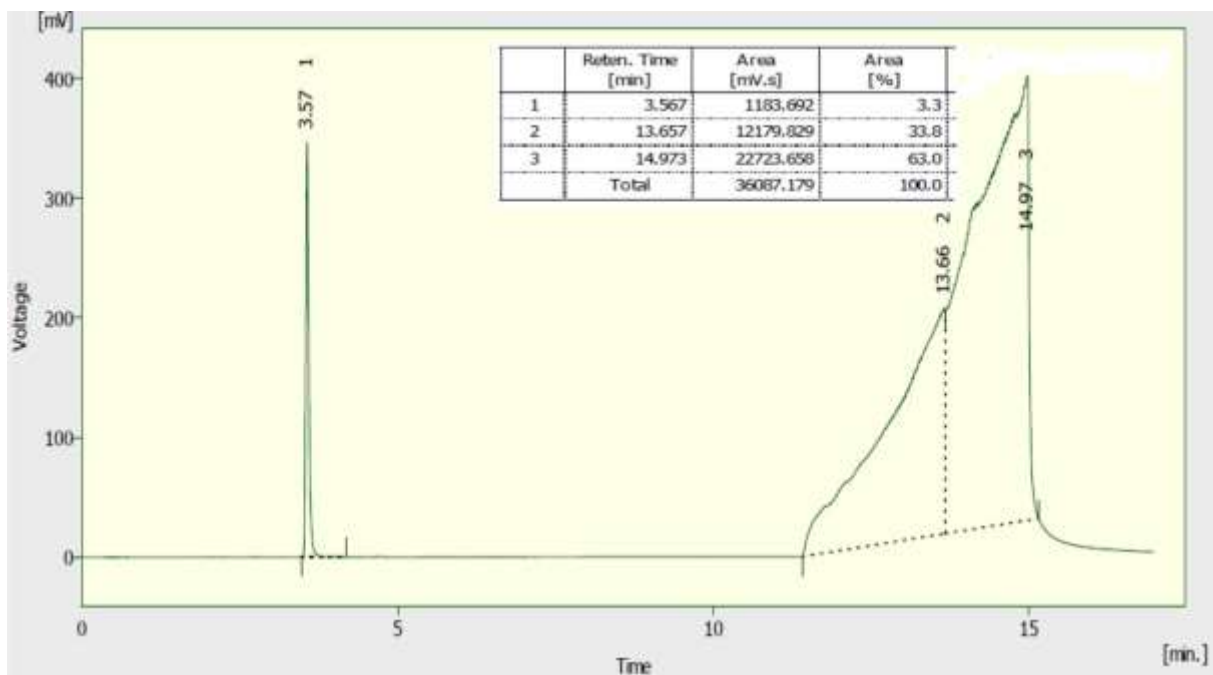

**Figure S10.** EtG after mixing with C<sub>6</sub>H<sub>12</sub> (3h).

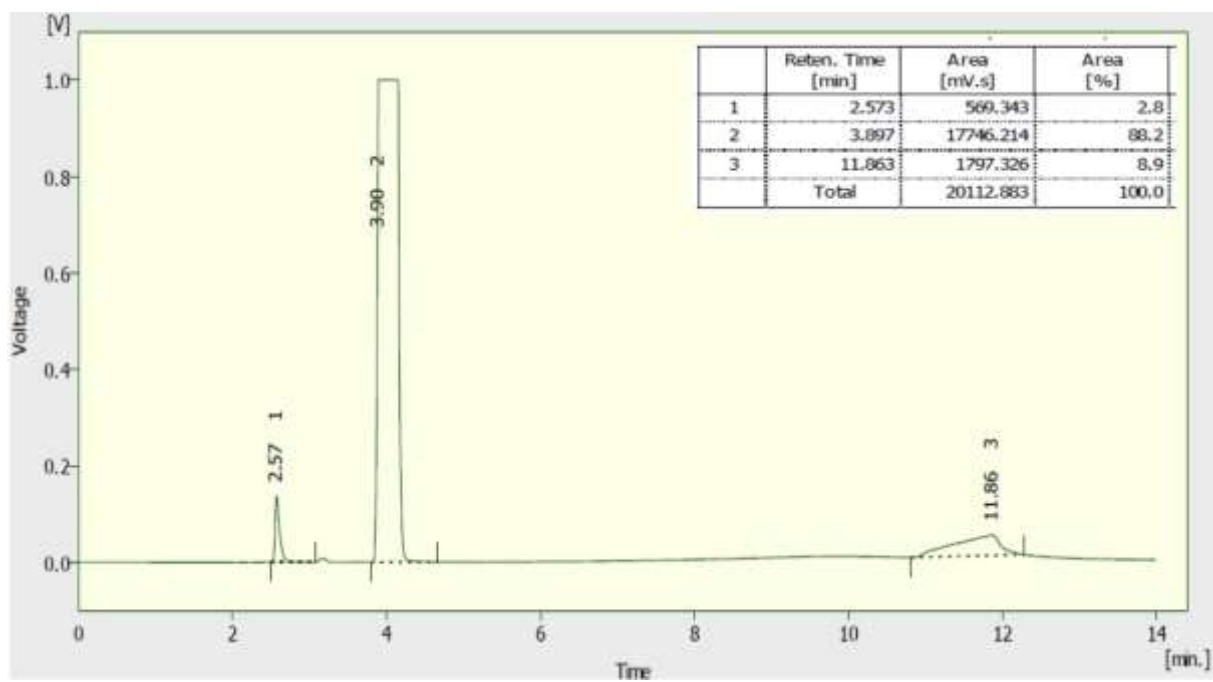

**Figure S11.** CHCl<sub>3</sub> after mixing with EtG (3h).

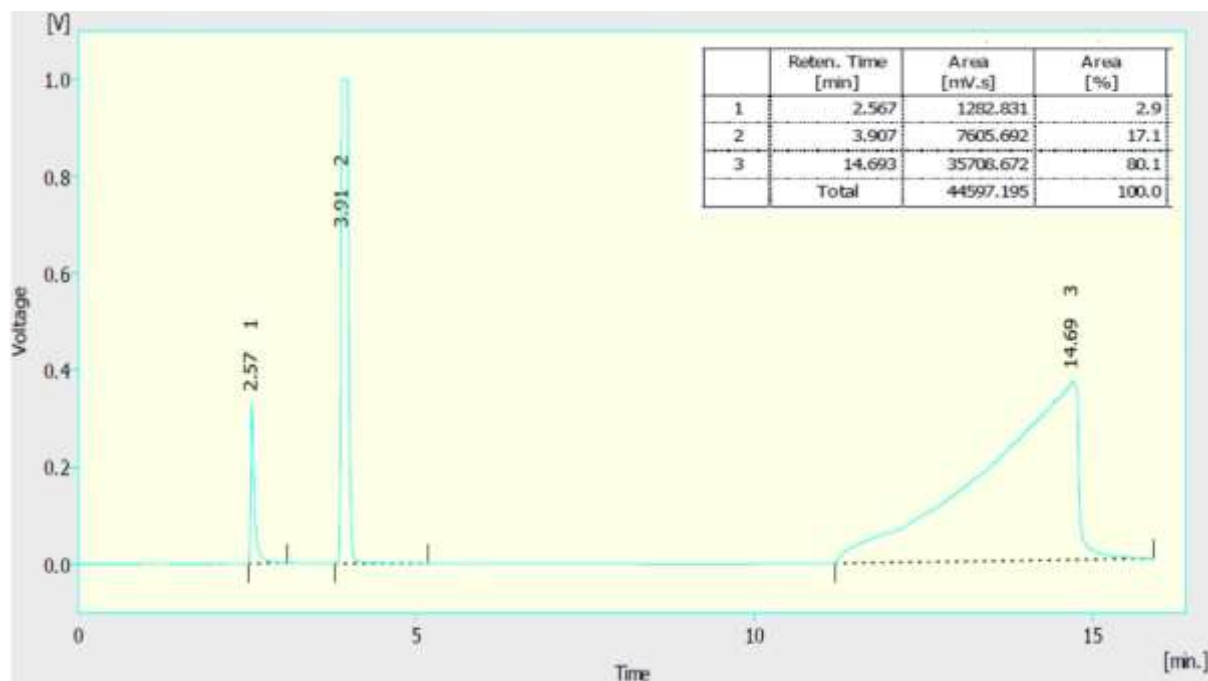

**Figure S12.** EtG after mixing with  $\text{CHCl}_3$  (3h).

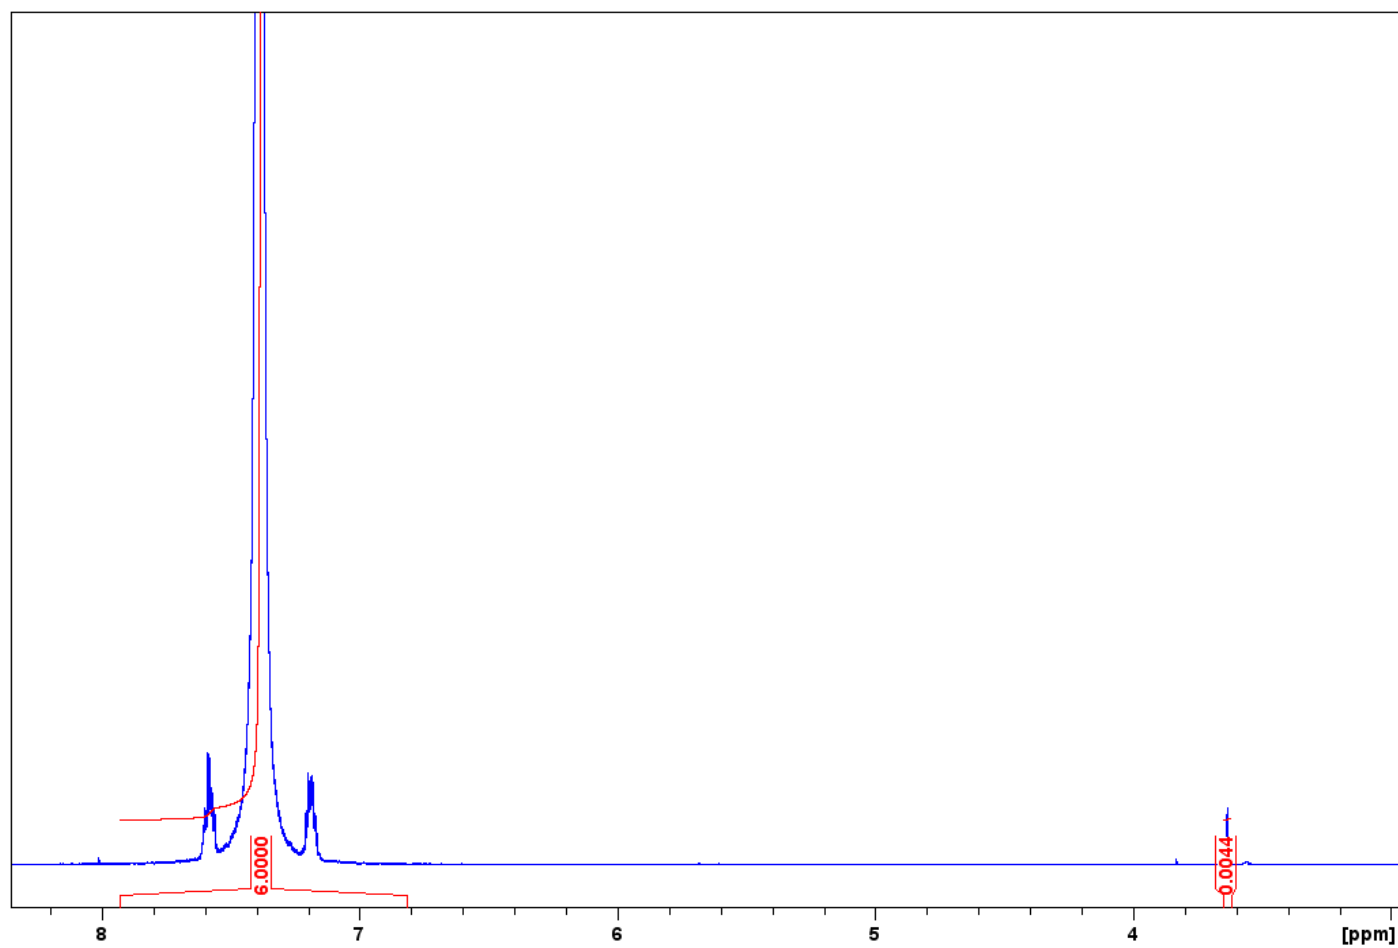

**Figure S13.**  $^1\text{H}$  NMR spectrum of benzene layer after mixing with EtG in acetone- $\text{d}_6$ .

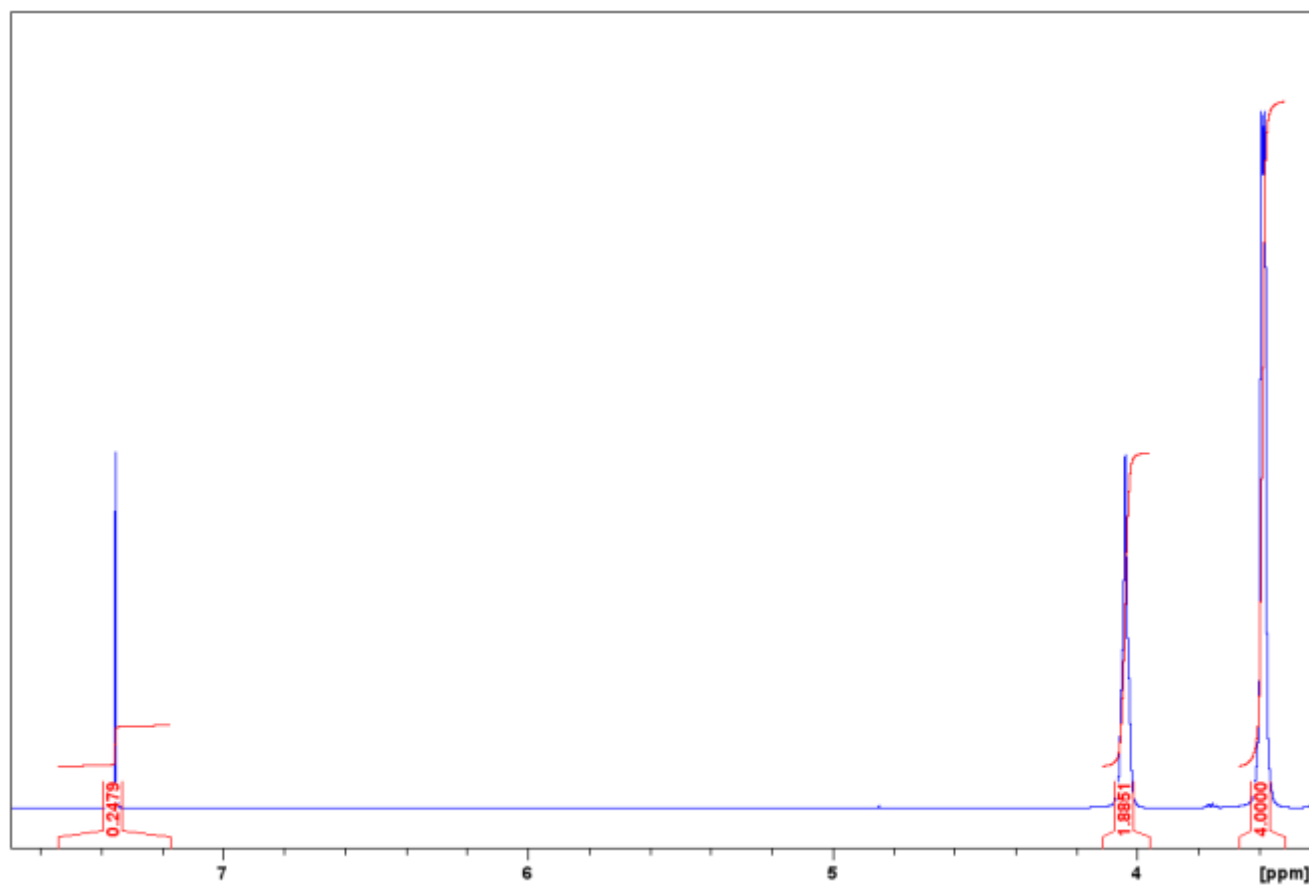

**Figure S14.**  $^1\text{H}$  NMR spectrum of EtG layer after mixing with benzene in acetone- $\text{d}_6$ .

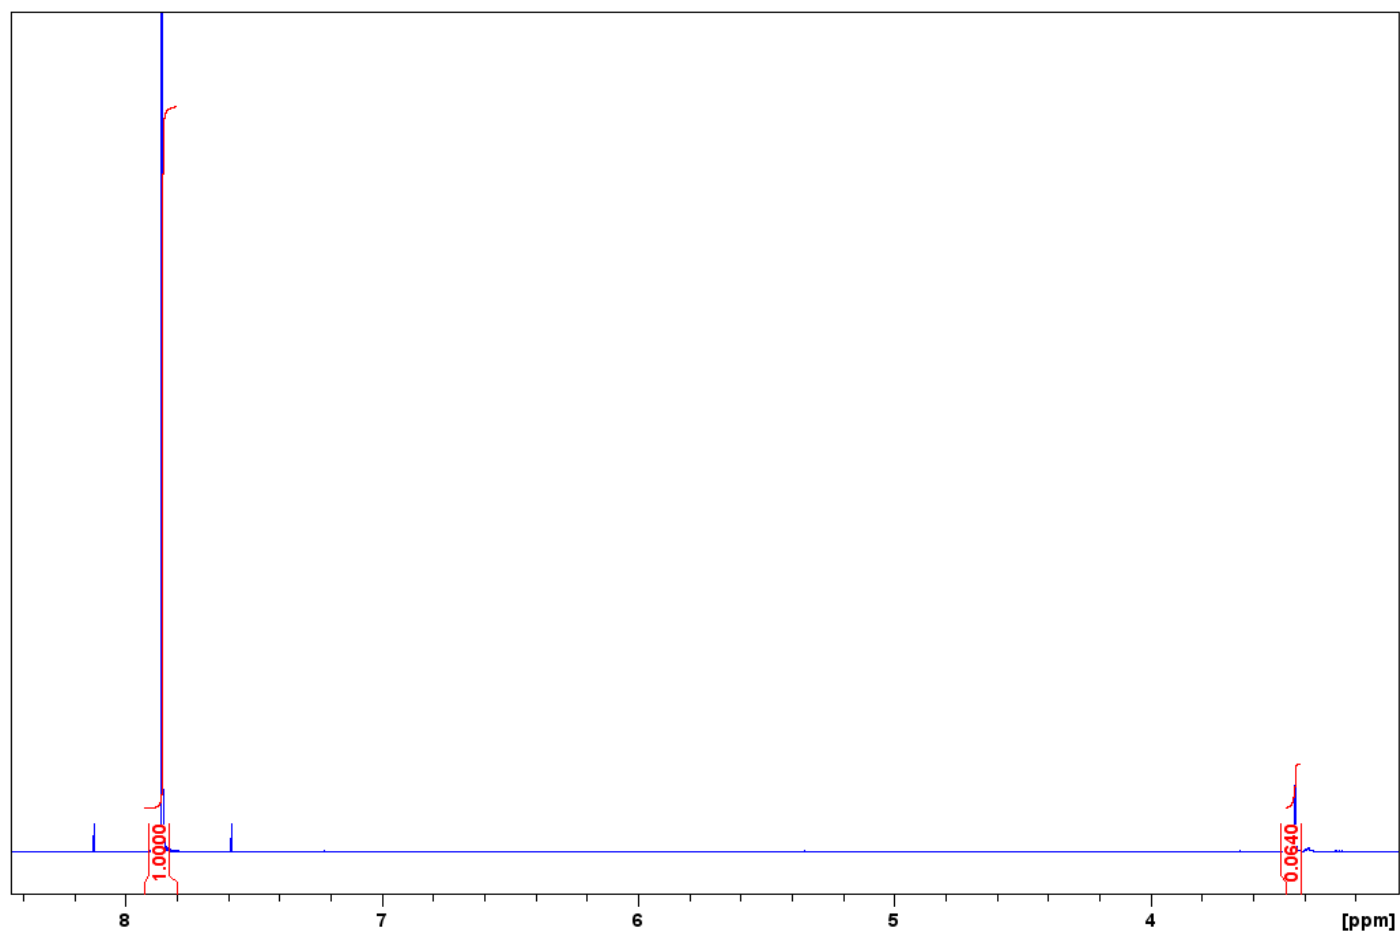

**Figure S15.**  $^1\text{H}$  NMR spectrum of chloroform layer after mixing with EtG in acetone- $\text{d}_6$ .

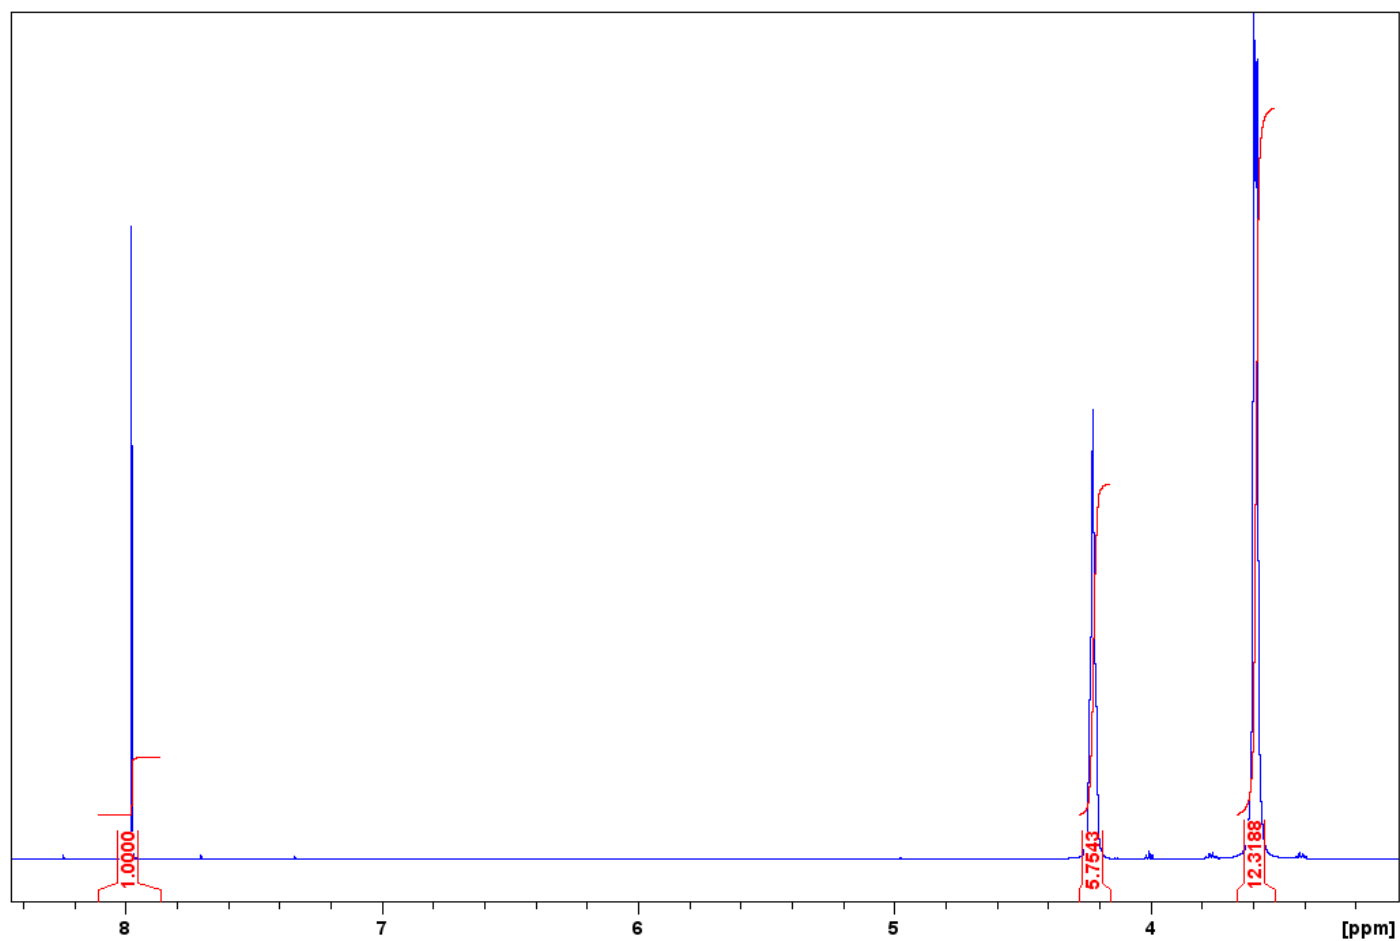

**Figure S16.**  $^1\text{H}$  NMR spectrum of EtG layer after mixing with chloroform in acetone- $\text{d}_6$ .

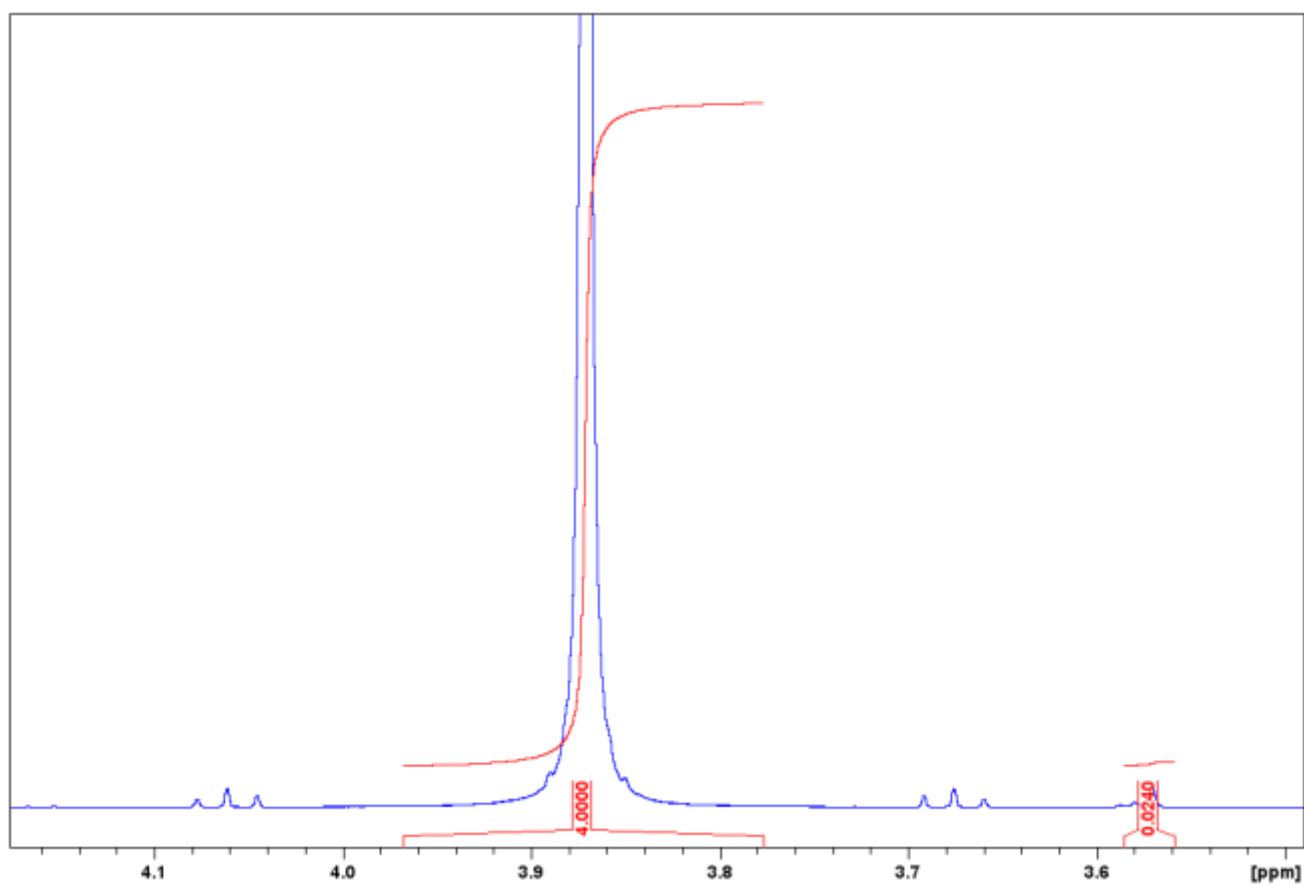

**Figure S17.**  $^1\text{H}$  NMR spectrum of dichloroethane layer after mixing with EtG in acetone- $\text{d}_6$ .

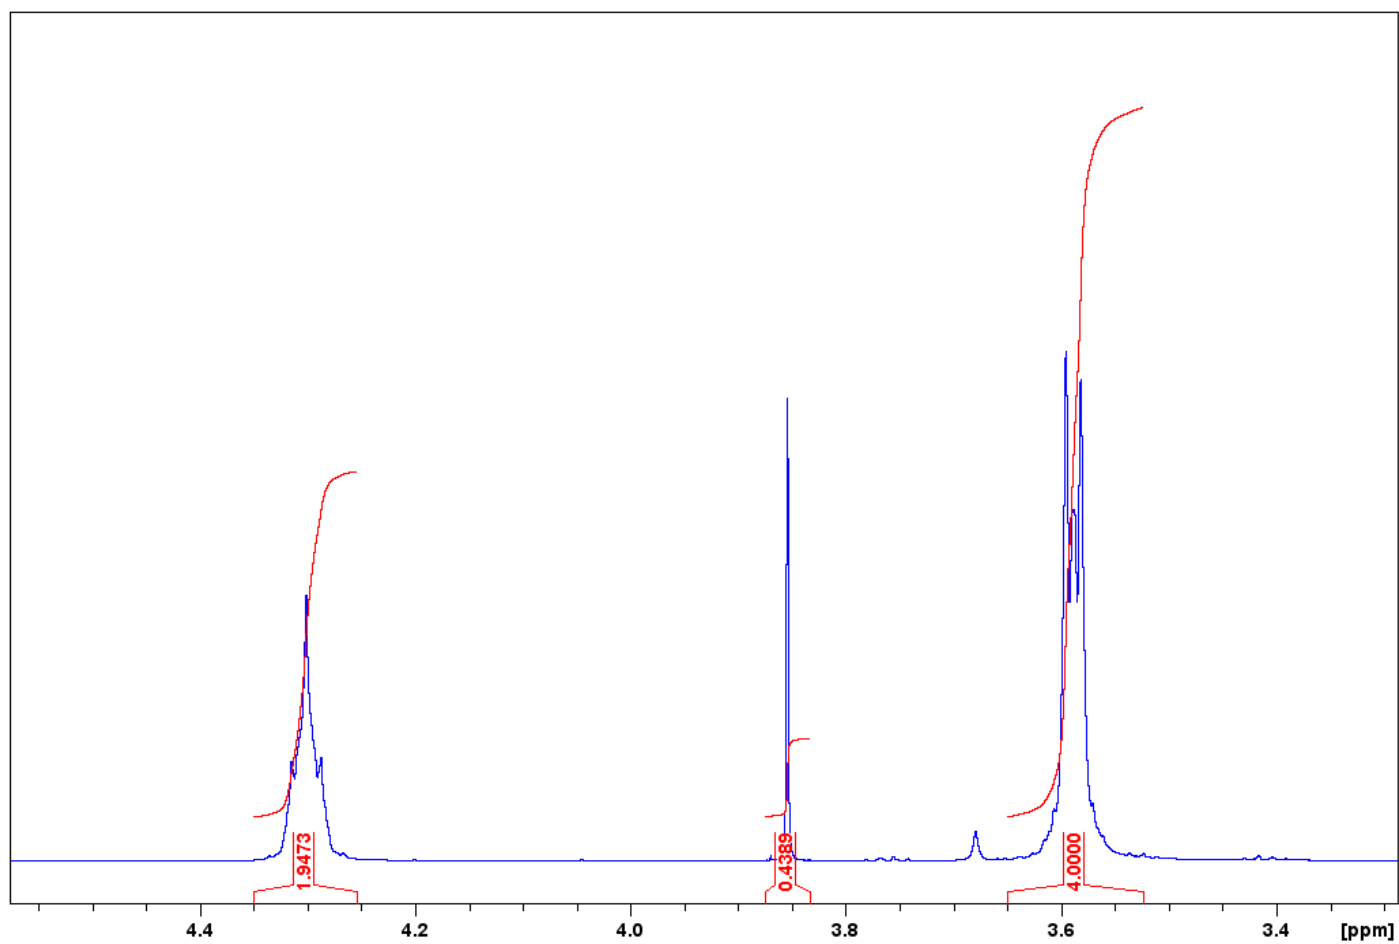

**Figure S18.**  $^1\text{H}$  NMR spectrum of EtG layer after mixing with dichloroethane in acetone- $\text{d}_6$ .

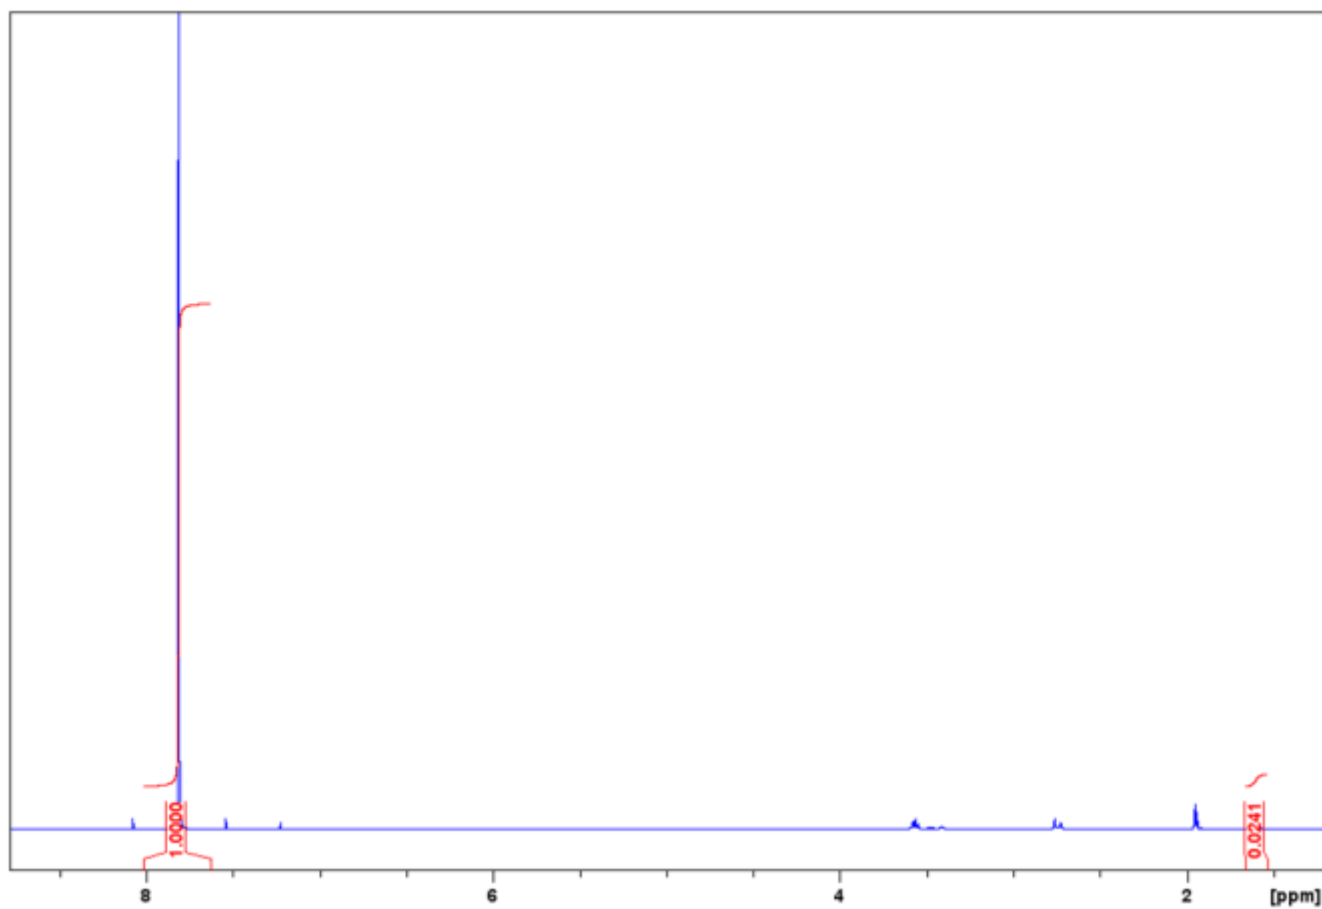

**Figure S19.**  $^1\text{H}$  NMR spectrum of  $\text{CHCl}_3$  layer after mixing with 1,3-propanediol in acetone- $\text{d}_6$ .

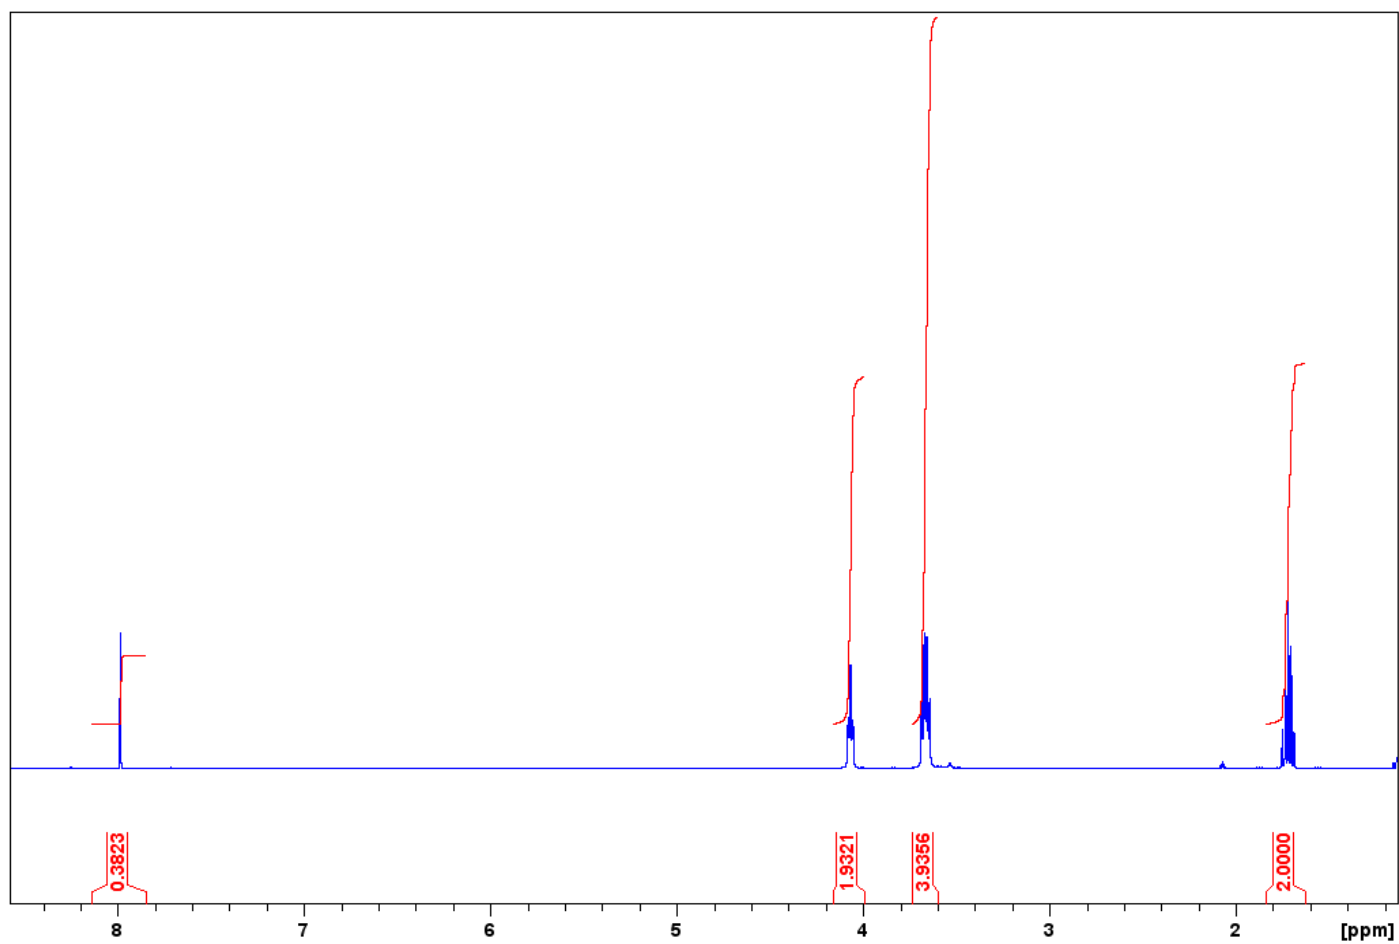

**Figure S20.**  $^1\text{H}$  NMR spectrum of 1,3-propanediol layer after mixing with  $\text{CHCl}_3$  in  $\text{acetone-d}_6$ .

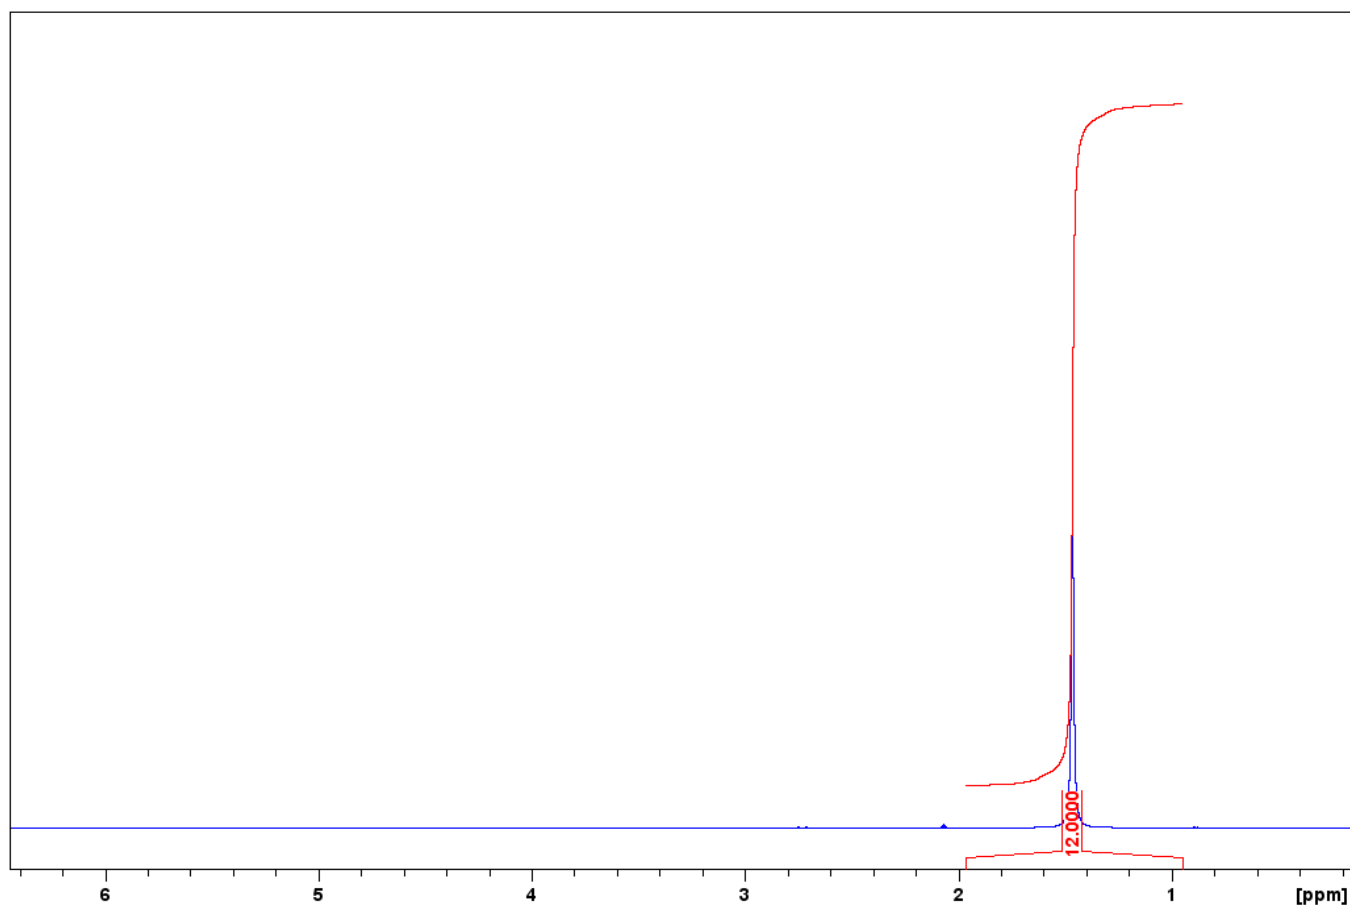

**Figure S21.**  $^1\text{H}$  NMR spectrum of cyclohexane layer after mixing with 1,2-propanediol in  $\text{acetone-d}_6$ .

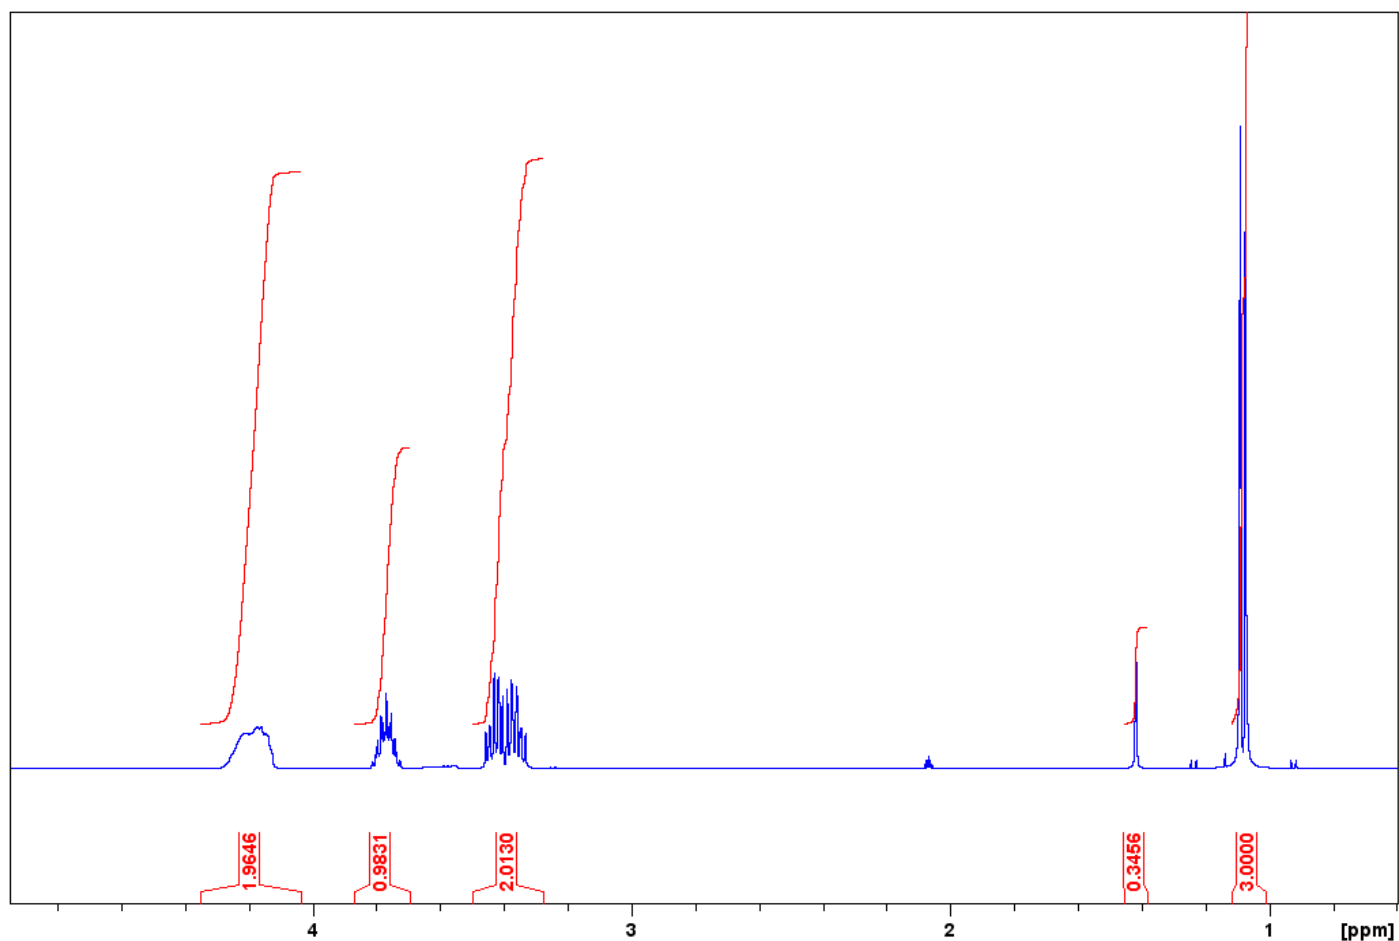

**Figure S22.**  $^1\text{H}$  NMR spectrum of 1,2-propanediol layer after mixing with cyclohexane in acetone- $\text{d}_6$ .

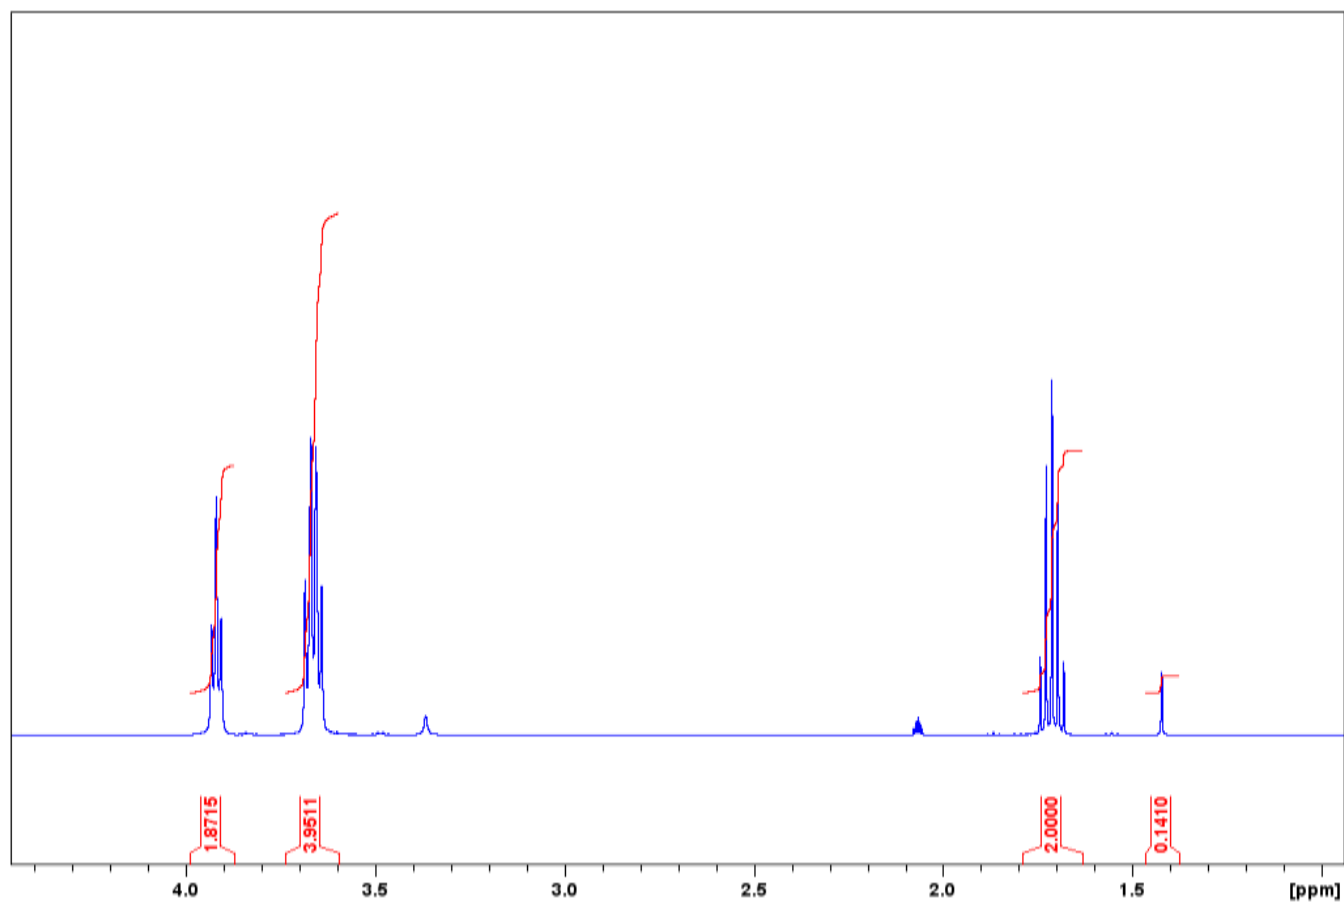

**Figure S23.**  $^1\text{H}$  NMR spectrum of 1,3-propanediol layer after mixing with cyclohexane in acetone- $\text{d}_6$ .

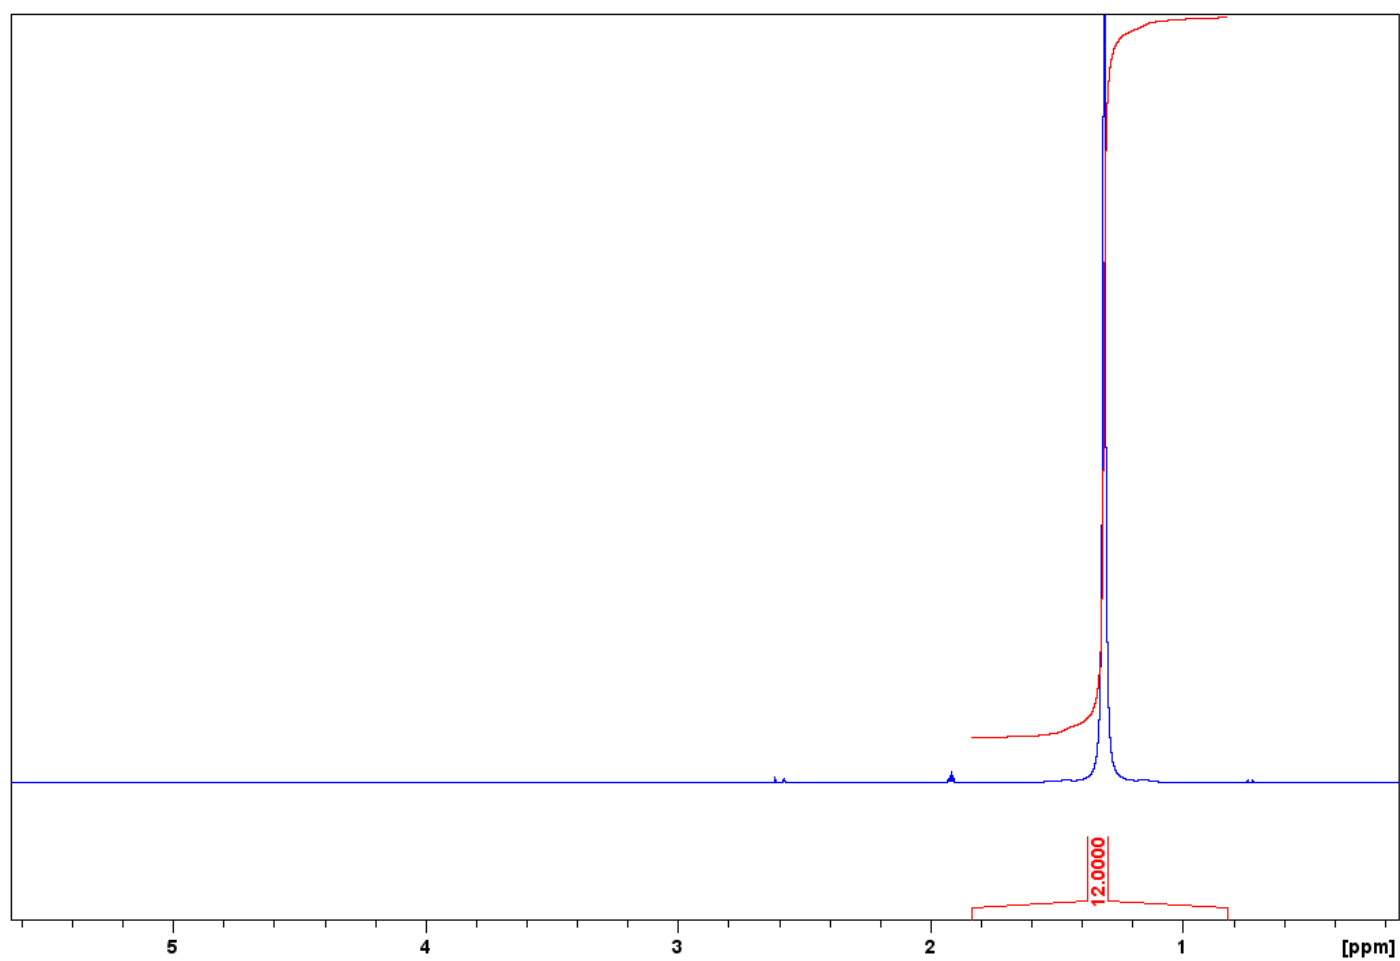

**Figure S24.**  $^1\text{H}$  NMR spectrum of cyclohexane layer after mixing with 1,3-propanediol in acetone- $\text{d}_6$ .
